# Spectrum and Prevalence of Atherogenic Risk Factors in 27,358 Children, Adolescents, and Young Adults With Type 1 Diabetes

Cross-sectional data from the German diabetes documentation and quality management system (DPV)

K. OTFRIED SCHWAB, MD<sup>1</sup>  
JÜRGEN DOERFER, MD<sup>1</sup>  
WOLFGANG HECKER, MD<sup>2</sup>  
JÜRGEN GRULICH-HENN, MD<sup>3</sup>  
DAGOBERT WIEMANN, MD<sup>4</sup>  
OLGA KORDONOURI, MD<sup>5</sup>

PETER BEYER, MD<sup>6</sup>  
REINHARD W. HOLL, MD<sup>7</sup>  
ON BEHALF OF THE DPV INITIATIVE OF THE  
GERMAN WORKING GROUP FOR  
PEDIATRIC DIABETOLOGY

**OBJECTIVE** — The aim of this data analysis was to ascertain the type and prevalence rate as well as age and sex distribution of cardiovascular risk factors in type 1 diabetic patients up to 26 years of age.

**RESEARCH DESIGN AND METHODS** — Cardiovascular risk factors such as obesity, hypertension, dyslipidemia, poor glycemic control, and smoking were analyzed in 27,358 patients who were divided into three groups (prepubertal, pubertal, and adult) using specifically designed diabetes software for prospective disease documentation.

**RESULTS** — More than half of the patients per age-group had at least one cardiovascular risk factor. Two risk factors were age dependently found in 6.2–21.7% and three or four risk factors in 0.5–4.7%. Elevated values of HbA<sub>1c</sub>, total cholesterol, and BMI were found most frequently. Hypertension, smoking, and HDL cholesterol were observed more frequently in males, and elevated BMI, total cholesterol, and LDL cholesterol more often in females. Although 28.6% of the patients had dyslipidemia, merely 0.4% of them received medical treatment, and of the 8.1% of the patients with hypertension, only 2.1% of them were given antihypertensive medication.

**CONCLUSIONS** — With increasing age, a greater number of patients with cardiovascular risk factors were observed. Significant sex differences were seen in the majority of risk factors. Despite the high prevalence of risk factors, only a small minority of patients received antihypertensive or lipid-lowering treatment. Early identification, prevention, and treatment of additional risk factors seem to be necessary, particularly in light of the high incidence of future cardiovascular disease.

*Diabetes Care* 29:218–225, 2006

From the <sup>1</sup>Department of Pediatrics and Adolescence Medicine, Freiburg University Hospital, Freiburg, Germany; the <sup>2</sup>Olgahospital, Children's Hospital, Stuttgart, Germany; the <sup>3</sup>Department of Pediatrics, Heidelberg University Hospital, Heidelberg, Germany; the <sup>4</sup>Department of Pediatrics, Magdeburg University Hospital, Magdeburg, Germany; the <sup>5</sup>Otto-Heubner Center of Pediatrics and Adolescents Medicine, Charité, Humboldt University Hospital, Berlin Germany; the <sup>6</sup>Clinic for Pediatrics, Protestant Hospital, Oberhausen, Germany; and the <sup>7</sup>Department of Epidemiology, Ulm University, Ulm, Germany.

Address correspondence and reprint requests to Prof. Dr. K.O. Schwab, MD, Department of Pediatrics and Adolescence Medicine, Freiburg University Hospital, Mathilden Str. 1, D-79106 Freiburg, Germany. E-mail: schwab@kikli.ukl.uni-freiburg.de.

Received for publication 25 April 2005 and accepted in revised form 20 October 2005.

**Abbreviations:** CVD, cardiovascular disease; DCCT, Diabetes Control and Complications Trial; DPV, diabetes data acquisition system for prospective surveillance; PDAY, Pathobiological Determinants of Atherosclerosis in Youth.

A table elsewhere in this issue shows conventional and Système International (SI) units and conversion factors for many substances.

© 2006 by the American Diabetes Association.

The costs of publication of this article were defrayed in part by the payment of page charges. This article must therefore be hereby marked "advertisement" in accordance with 18 U.S.C. Section 1734 solely to indicate this fact.

Type 1 diabetes is increasingly recognized as an independent risk factor for premature cardiovascular disease (CVD) and elevated cardiovascular death rate in patients aged 20–39 years (1). Postmortem studies in children and youth who had died an unnatural death also showed that the development of atherosclerotic lesions of the vessel wall starts in childhood and that there is a close relationship to cardiovascular risk factors. In the Bogalusa Heart Study (2) and the Pathobiological Determinants of Atherosclerosis in Youth (PDAY) study (3), the evaluation of premortal existing risk factors (glycohemoglobin >8%, increased lipids, hypertension, obesity, and smoking) verified their unfavorable influence on the progression of atherosclerosis. Because childhood and adolescence diabetes is commonly associated with additional risk factors (4,5), we conducted this analysis to obtain reliable data about character and prevalence rate as well as age and sex differences of potential atherogenic risk factors in a large population of German children, adolescents, and young adults with type 1 diabetes.

## RESEARCH DESIGN AND METHODS

Based on the continuous diabetes data acquisition system for prospective surveillance (DPV), a cross-sectional analysis was carried out to evaluate associated cardiovascular risk factors in patients with type 1 diabetes. The data documentation DPV started in 1990 and comprises complete demographic characteristics and diabetes-related findings. Anonymous longitudinal data from patients are transmitted for central validation and analyses twice yearly (6,7). Inconsistent data are verified and, if necessary, corrected at the participating centers and reentered in the system. This data analysis considers all type 1 diabetic patients who entered the DPV system by the

end of September 2004 and is primarily focused on cardiovascular risk factors. Pathological changes of the following parameters were defined as potential atherogenic risk factors: lipid risk factors: total cholesterol, LDL cholesterol, and HDL cholesterol; nonlipid risk factors: HbA<sub>1c</sub> (A1C), BMI, blood pressure, and smoking. We additionally performed both multivariate analyses of each cardiovascular risk factor with regard to age, diabetes duration, sex, and overweight and a trend analysis of risk factors (BMI, dyslipidemia, total cholesterol >200 mg/dl [ $>5.2$  mmol/l], systolic and diastolic hypertension, and A1C >9.0%) covering the period from 1994 to 2004.

A total of 27,358 patients with type 1 diabetes were consecutively registered at 195 German and Austrian Centers for Pediatrics and Internal Medicine. For reasons of analysis the total number of patients was divided into three age-groups based on the developmental stage: age-group 1 (0.25–11 years) covers childhood or prepuberty, age-group 2 (12–16 years) covers early adolescence or puberty, and age-group 3 (17–26.0 years) covers later adolescence and young adulthood.

### Nonlipid risk factors

**A1C.** For long-term control of the diabetes management, A1C was measured. For risk factor assessment, A1C levels of all patients were divided into two groups: >7.5 and >9.0%. Values of locally measured A1C were standardized according to the Diabetes Control and Complications Trial (DCCT) reference range of 4.05–6.05% (8).

**BMI.** BMI, derived from weight in kilograms divided by the square of height in meters (2), is an accepted measure of overweight and obesity in children, adolescents, and adults. Reference values in the form of age- and sex-adjusted percentiles allow an individual assessment of BMI data in children and adolescents. Overweight was defined as the 90th–97th BMI percentile and obesity as >97th percentile. BMI values of >25 and >30 kg/m<sup>2</sup> are the corresponding threshold values for adults >18 years of age. Normative data for German children, adolescents, and adults used in the DPV software relate to Kromeyer-Hauschild et al. (9) and Mensink et al. (10).

**Hypertension.** Systolic and diastolic blood pressure were measured with Riva-Rocci's method, which is based on auscultatory measurements using a standard

clinical sphygmomanometer (11). Normative blood pressure data developed by the Task Force on Blood Pressure Control in children served as reference values (12). Hypertension was defined as the median value calculated from at least three measurements taken between September 2003 and September 2004.

**Smoking.** A patient was documented as a smoker when he or she smoked more than one cigarette per day. Smoking habits were asked for during history taking.

### Lipid risk factors

Venous blood samples were taken after a recommended 12-h fasting for plasma concentrations of total cholesterol, LDL cholesterol, HDL cholesterol, and triglyceride levels. By the aid of sample tests, we ascertained that in some patients the 12-h fasting period was not sufficiently met. Therefore, we excluded triglycerides from the analysis because triglycerides, unlike cholesterol, show a close relationship to food intake (13).

**Total cholesterol.** Total cholesterol serves as a screening parameter for hypercholesterolemia and is composed of the cholesterol parts of all plasma lipoproteins that are VLDL, LDL, and HDL. Total cholesterol was measured enzymatically. Values >200 mg/dl ( $>5.2$  mmol/l) were defined as high risk (14).

**LDL cholesterol.** LDL particles represent the principal atherogenic lipoprotein fraction. LDL cholesterol was calculated from Friedewald's formula if triglyceride levels were <400 mg/dl ( $<4.7$  mmol/l). Plasma elevation of LDL cholesterol >130 mg/dl ( $>3.4$  mmol/l) was classified abnormal and concentrations >160 mg/dl ( $>4.1$  mmol/l) were used as the reference value for patients at high risk who require lipid-lowering pharmacotherapy if diet and lifestyle changes failed (14,15).

**HDL cholesterol.** HDL particles are responsible for the reverse cholesterol transport from the periphery to the liver and have antiatherogenic activities. HDL concentrations were determined after dextran sulfate–magnesium precipitation of apolipoprotein B–containing lipoproteins. We considered a HDL cholesterol value <35 mg/dl ( $<0.9$  mmol/l) as abnormal according to the National Cholesterol Education Program definition for youth (14).

### Statistical methods

All analyses were performed using SAS software (version 9.1; SAS Institute, Cary,

NC). Nonparametric statistics (Kruskal-Wallis) were used for comparison among groups. Results were expressed as means  $\pm$  SD, and  $P < 0.05$  was considered statistically significant.

## RESULTS

### Assessment of cardiovascular risk factors

The prevalence of risk factors showed small changes between 1994 and 2004. There was some increase of BMI but a small decrease in dyslipidemia, total cholesterol >200 mg/dl ( $>5.2$  mmol/l), systolic and diastolic hypertension, and A1C >9.0%. For all patients, the percentages of available data were 71.9–96.2% for nonlipid variables (A1C, BMI, blood pressure, and smoking) and 41.3–70.8% for lipid variables (total cholesterol, LDL cholesterol, and HDL cholesterol) (Table 1).

### Number of cardiovascular risk factors

Apart from the ratio of males to females, all patient characteristics and risk factors mentioned in Table 1 showed statistically significant differences between the age-groups. Overall, 69% of 27,358 subjects investigated had one or more of the risk factors analyzed. The vast majority of patients showed one risk factor (53%), followed with decreasing frequency by patients without any risk factor (31%), two risk factors (14%), and three to four risk factors (2%). Two or more risk factors per patient were found most frequently in patients of age-group 3. All differences among age-groups were statistically significant ( $P < 0.001$ ). Multivariate analyses showed that overweight (BMI) was most closely related ( $\beta$  value/estimate = 0.184,  $P < 0.001$ ) to the number of cardiovascular risk factors, followed by age ( $\beta$  value/estimate = 0.033,  $P < 0.001$ ) and diabetes duration ( $\beta$  value/estimate = 0.012,  $P < 0.001$ ).

### Distribution of cardiovascular risk factors per age-group

Both nonlipid and lipid risk factors showed the same age-dependent distribution (Fig. 1). The lowest number of affected patients belonged to age-group 1 and the highest to age-group 3. Elevated values of A1C, total cholesterol, and BMI were found most frequently. All calculated group differences reached statistical significance ( $P < 0.0001$ ).

Table 1—Clinical and laboratory characteristics per age-group in patients with type 1 diabetes

| Characteristic             | Total number of patients | Frequency of complete records (%) | Age-group 1 | Age-group 2 | Age-group 3 | P value* |
|----------------------------|--------------------------|-----------------------------------|-------------|-------------|-------------|----------|
| Age (years)                | 27,358                   | 100.0                             | 7.5 ± 2.5   | 13.7 ± 1.4  | 18.5 ± 2.3  | <0.0001  |
| Age range (years)          | 27,358                   | 100.0                             | 0.25–11     | 12–16       | 17–26       |          |
| Male sex (%)               | 27,358                   | 100.0                             | 51.7        | 51.7        | 52.5        | NS       |
| Age at diagnosis (years)   | 27,358                   | 100.0                             | 5.0 ± 2.5   | 8.8 ± 3.6   | 10.4 ± 4.4  | <0.0001  |
| Diabetes duration (years)  | 27,358                   | 100.0                             | 2.5 ± 2.3   | 4.9 ± 3.6   | 8.2 ± 4.8   | <0.0001  |
| A1C (%)†                   | 26,308                   | 96.2                              | 7.8 ± 1.5   | 8.5 ± 1.8   | 8.6 ± 2.0   | <0.0001  |
| Any dyslipidemia (%)       | 19,359                   | 70.8                              | 22.3        | 29.4        | 34.2        | <0.0001  |
| Lipid-lowering therapy (%) | 27,358                   | 100.0                             | 0.08        | 0.3         | 0.8         | <0.0001  |
| Total cholesterol (mg/dl)‡ | 18,917                   | 69.1                              | 174 ± 40    | 182 ± 48    | 184 ± 47    | <0.0001  |
| LDL cholesterol (mg/dl)‡   | 11,286                   | 41.3                              | 95 ± 35     | 101 ± 40    | 105 ± 40    | <0.0001  |
| HDL cholesterol (mg/dl)‡   | 12,811                   | 46.8                              | 62 ± 19     | 62 ± 17     | 59 ± 18     | <0.0001  |
| Raised systolic BP (%)     | 25,184                   | 92.1                              | 5.8         | 7.4         | 11.0        | <0.0001  |
| Raised diastolic BP (%)    | 25,178                   | 92.0                              | 3.9         | 3.2         | 2.6         | <0.0001  |
| BP-lowering therapy (%)    | 27,358                   | 100.0                             | 0.2         | 1.4         | 4.8         | <0.0001  |
| BMI SDS                    | 25,145                   | 91.9                              | 0.42 ± 0.9  | 0.45 ± 0.9  | 0.42 ± 0.9  | <0.0075  |
| BMI >90th percentile (%)   | 25,145                   | 91.9                              | 16.4        | 20.0        | 25.0        | <0.0001  |
| Smoking (%)                | 19,683                   | 71.9                              | 0.24        | 10.53       | 34.75       | <0.0001  |

Data are means ± SD unless otherwise indicated. \*Kruskal-Wallis test. †DCCT standardized. ‡To convert values to mmol/l, multiply by 0.02586. BP, blood pressure; SDS, standard deviation score.

### Sex distribution of cardiovascular risk factors

**Nonlipid risk factors.** The percentage of elevated A1C values (>7.5%,  $P < 0.001$ ; >9.0%,  $P < 0.05$ ) and BMI (90th–97th or >97th percentile,  $P < 0.001$ , respectively) were higher in female than in male subjects (Fig. 2). Frequency of hypertension and current smoking were significantly higher in males than in females ( $P < 0.001$ , respectively).

**Lipid risk factors.** Total cholesterol and LDL cholesterol levels were higher in female than in male subjects ( $P < 0.0001$ , respectively). However, no significant difference of HDL cholesterol was found between female and male subjects.

### Frequency of pharmacotherapy

A high percentage of patients had dyslipidemia (28.6%); 8.1% of the patients had systolic hypertension and 2.5% diastolic hypertension. However, the percentage of patients who received lipid-lowering (0.4%) or blood pressure-lowering (2.1%) treatment was extremely low (Table 1).

**CONCLUSIONS**— There has been growing awareness during the past few years that type 1 diabetes is an independent risk factor for premature atherosclerotic CVD, which can be accelerated by potentially atherogenic risk factors such as hypertension, dyslipidemia, hypergly-

cemia, obesity, smoking, albuminuria, or physical inactivity (1,5,16). Our results showed that 69% of the 27,358 subjects investigated had one or more of the cardiovascular risk factors analyzed in this study. Multiple risk factors and their interrelationships but also a family history of premature cardiovascular disease, increasing age, or longer duration of diabetes are discussed in the literature as main determinants of enhanced risk for future CVD (17,18).

A detailed profile analysis of our diabetes registry showed that the number of patients at risk, divided into three distinct age-groups, is significantly increasing with age with respect to all risk factors. The most frequently diagnosed risk factor was a raised A1C value. Poor glycemic control is particularly associated with the development of long-term microvascular complications (19), which could be proven impressively by the DCCT (20). In a more recent DCCT publication, an association between glycemia and intima-media thickness, an accepted marker for early atherosclerosis, in patients with type 1 diabetes was demonstrated (21). Further investigations could show that there is a direct relationship between A1C levels and the extent of atherosclerosis. Gerstein et al. (22) found that the intima-media thickness increased 0.026 mm for every 0.9% increase in A1C ( $P < 0.0001$ ). In another study, A1C levels >7.5% were

identified as a strong risk factor for progression of coronary artery calcification in type 1 diabetic patients aged 22–50 years (23). The British Diabetic Association Cohort Study investigated 23,752 patients with type 1 diabetes. Compared with the general population, type 1 diabetic patients aged 20–39 years had a fivefold higher risk of dying from cardiovascular events (1).

Overweight and obesity are thought to be cardiovascular risk factors per se with regard to the development of dyslipidemia, hypertension, type 2 diabetes, and the metabolic syndrome (24,25). If obese children become obese adults, one of the long-term consequences may be early atherosclerosis and increased cardiovascular morbidity (26,27). According to our results, overweight, obesity, and hypertension were found in 3.8–15.5% of the patients observed. Prevention and treatment of these modifiable risk factors should begin as early as possible because counseling of the patient, lifestyle modification, and pharmacologic therapy are quite promising interventions to retard damage or avoid further harm.

The high percentage of smokers in many countries is alarming. The Global Youth Tobacco Survey reported data for 16,416 U.S. students aged 13–15 years, of whom 23.1% are currently using any tobacco product (28). In the PDAY study (4), a 44.0% prevalence of smoking in

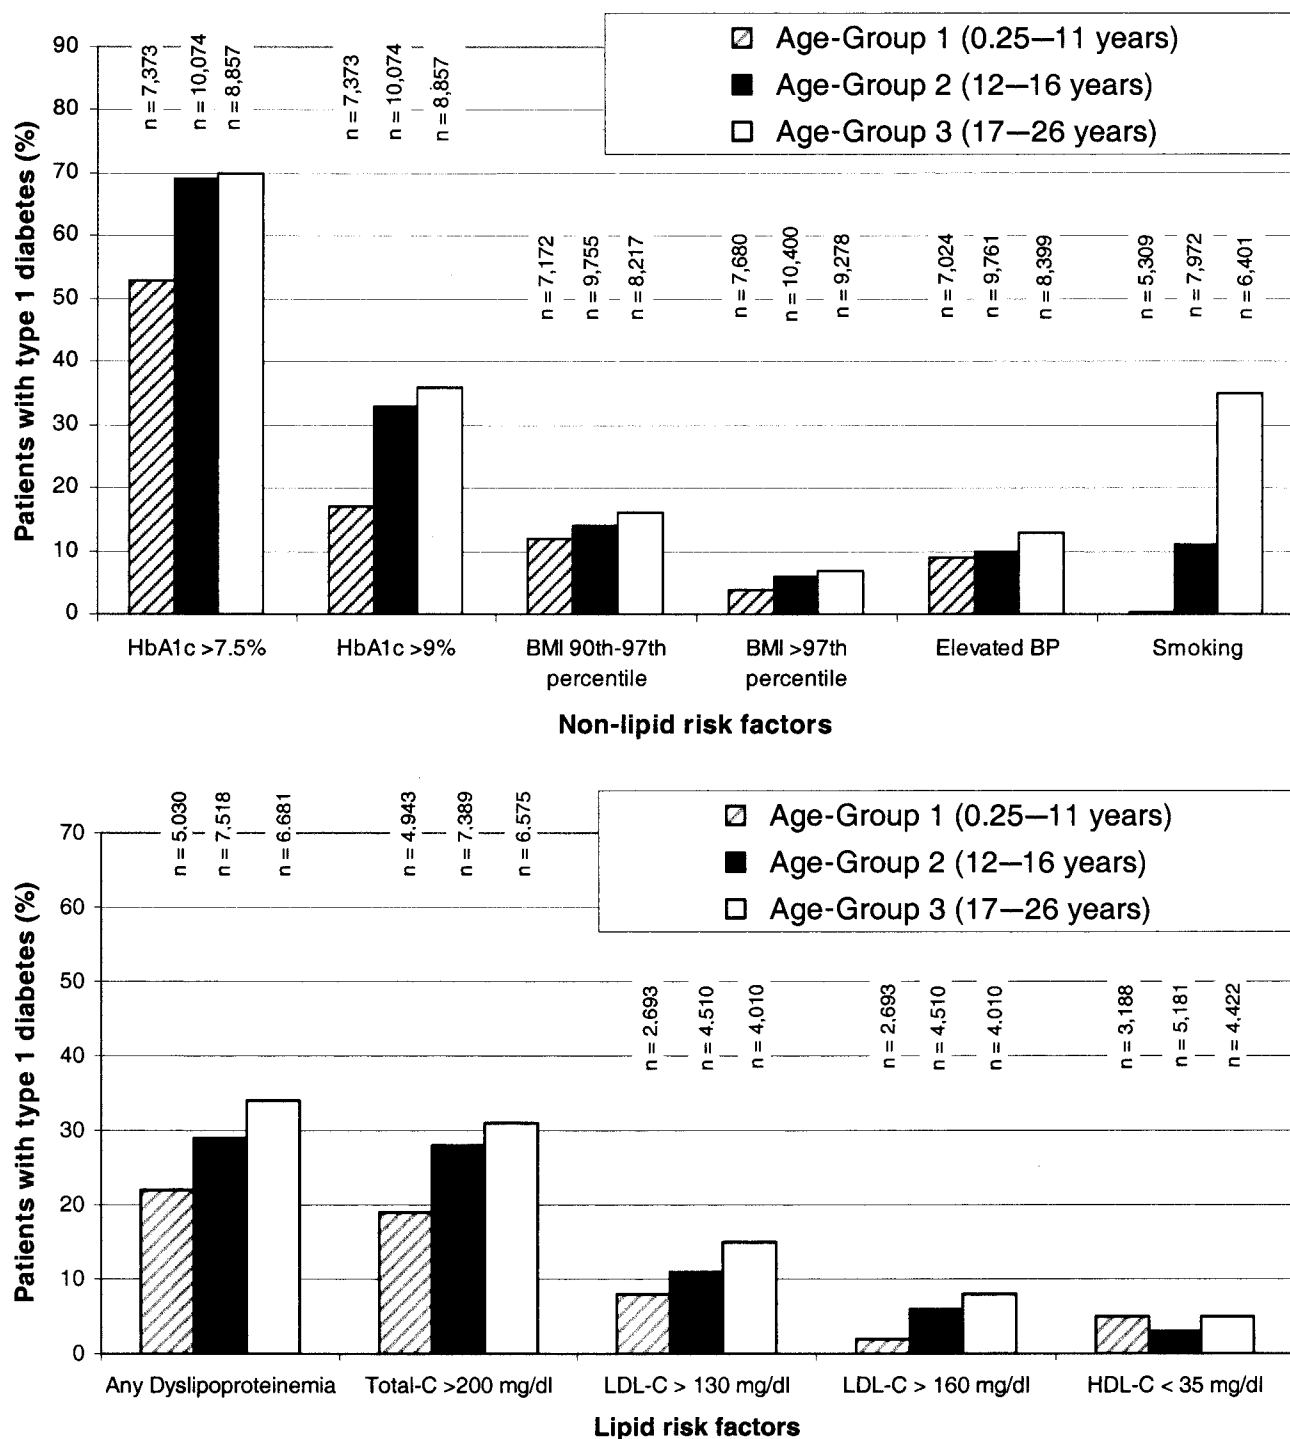

**Figure 1**—Age distribution of cardiovascular risk factors, divided into nonlipid and lipid parameters. The total number of patients investigated per age-group is shown above each bar.

subjects aged 15–34 was calculated. The Behavioral Risk Factor Surveillance System in the U.S. indicated that the prevalence of smoking among adults with diabetes was 23.6% in 1990 and 23.2% in 2001. Among participants without diabetes, the prevalence was similar, showing

24.2% in 1990 and 23.2% in 2001 (29). All these studies show a similar prevalence of smokers compared with our data.

Taking into account the occurrence of at least one abnormality among the lipid variables we analyzed, the number of patients with any dyslipidemia increased

significantly from 22.3% in age-group 1 to 34.3% in age-group 3. Total cholesterol values >200 mg/dl (>5.2 mmol/l) emerged in about 26% of all patients, LDL cholesterol >130 mg/dl (>3.4 mmol/l) in about 11%, and LDL cholesterol >160 mg/dl (>4.1 mmol/l) in about 5.3%. In-

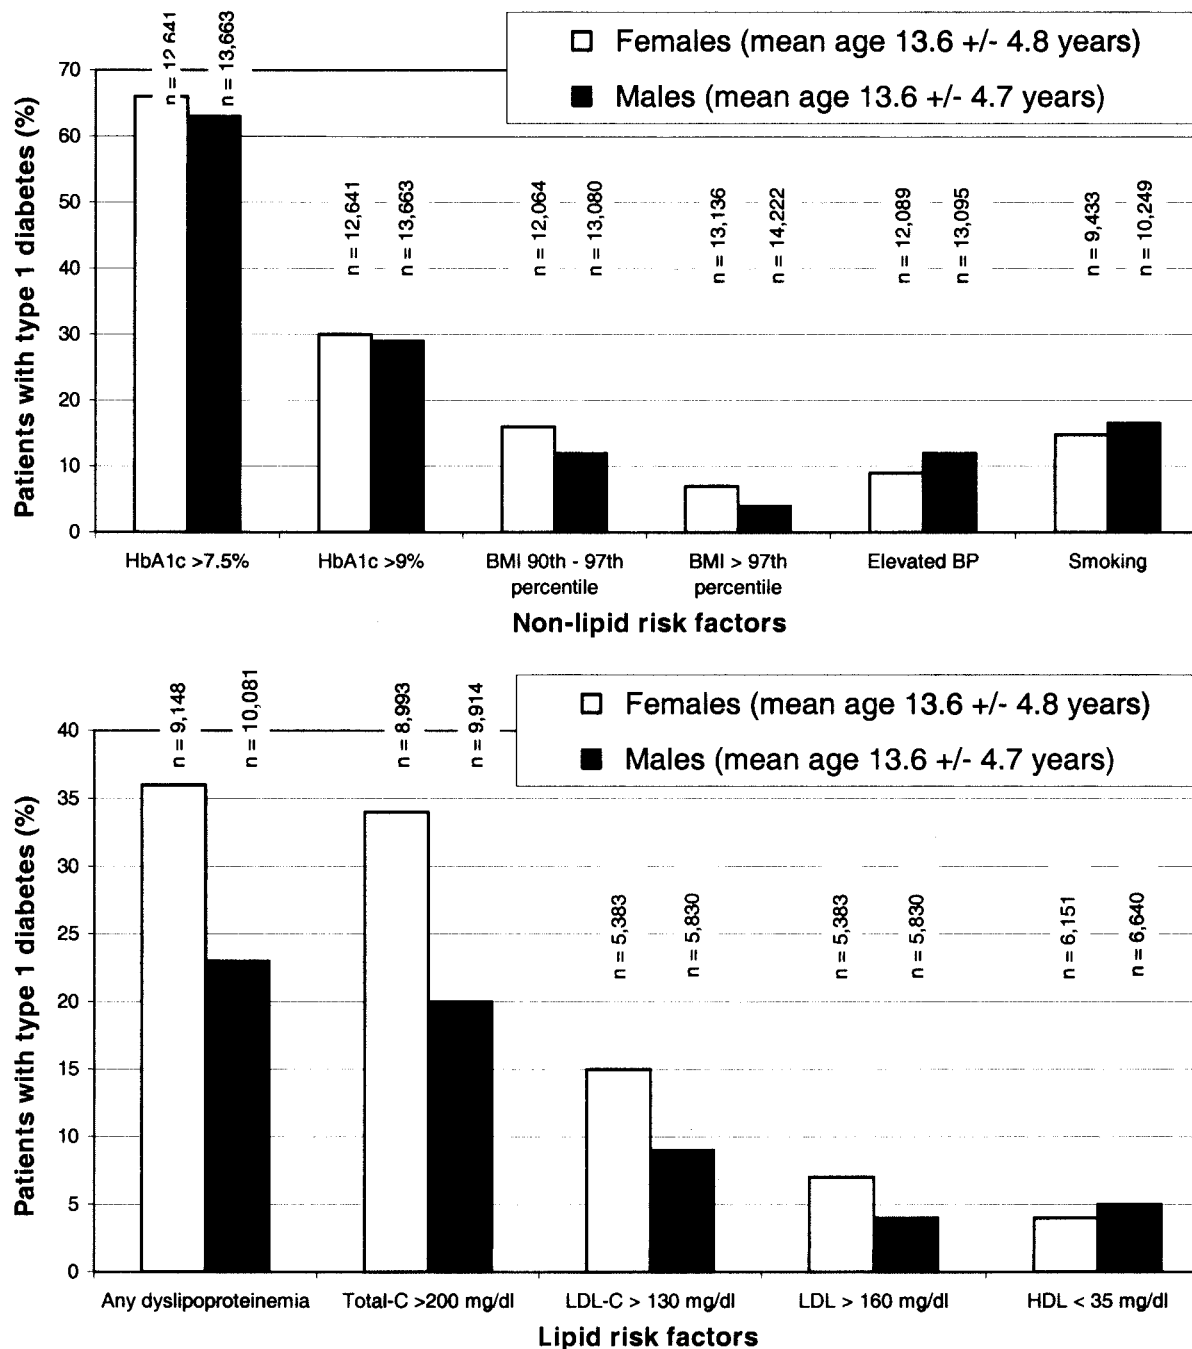

**Figure 2**—Sex distribution of cardiovascular risk factors, divided into nonlipid and lipid parameters. The total number of patients investigated is shown above each bar.

sulin deficiency is associated with reduced activity of LDL receptors, and glycation of LDL particles reduces their receptor affinity, thereby impairing the clearance of LDL cholesterol and increasing their susceptibility to oxidation. Longer diabetes duration, hyperglycemia, albuminuria, hypertriglyceridemia, and lower HDL cholesterol are associated with elevated levels of small dense LDL particles that are extremely atherogenic (30, 31).

The risk factor profiles of our patients vary according to sex. Raised blood pressure and current smoking were lower in female than in male subjects, whereas increased A1C, total cholesterol, LDL cholesterol, and BMI values emerged in female subjects. It is known that women with type 1 diabetes have an increased risk of developing CVD and, therefore, equalizing the sex difference seen in the general population (32). In addition to the risk factors discussed here, several

variables are related to CVD in women such as age, fasting triglyceride levels, albumin excretion rate, retinopathy, fat distribution, and depressive symptomatology (15,33).

With regard to the management of additional atherogenic risk factors, there is a considerable discrepancy in juvenile type 1 diabetic patients between the high risk for future cardiovascular morbidity and the low treatment rate of modifiable risk factors such as hypertension and dys-

lipidemia. The main reason may be the lack of drugs that are generally recognized as safe and effective for long-term use in diabetic children and adolescents.

Besides regular risk factor testing, it is also necessary to draw therapeutic conclusions from abnormal findings to continuously improve quality of diabetes care long term. In a recently published retrospective cohort study, 1,765 adult patients with type 1 or type 2 diabetes were included if they had at least two visits within 24 months. The authors found that despite a high rate of annual A1C, blood pressure, and cholesterol measurements, rates of required medication initiation and dose adjustment were comparatively low (34).

Although vascular complications are normally subclinical during childhood and adolescence, cardiovascular risk factors should be given our full attention to reduce risk by optimal metabolic control and lifestyle modification (35,36). Only if these efforts are insufficient is pharmacotherapy a reasonable form of treatment, but it must be individualized based on the number of atherogenic risk factors, family history, and existing complications.

Hypertension in children and adolescents with type 1 diabetes may primarily be treated early with ACE inhibitors, as was the case in 83% of our patients. These agents have antihypertensive effects and reduce the incidence of microalbuminuria and nephropathy (37).

Besides hypertension, dyslipidemia is a common concomitant disease in patients with diabetes. Moderate hypertriglyceridemia, lower HDL cholesterol levels, and hypercholesterolemia with elevated levels of LDL cholesterol and small, dense LDL particles can be seen in type 1 diabetes (5,38). The American Diabetes Association strongly recommends lipid-lowering pharmacotherapy for patients with LDL >160 mg/dl (>4.1 mmol/l) but for LDL cholesterol values between 130 and 159 mg/dl (3.4 and 4.1 mmol/l, respectively) only if nutrition therapy and lifestyle changes fail. In any case, the treatment target is LDL cholesterol <100 mg/dl (<2.6 mmol/l) (15). In adults with diabetes, fibrates are recommended for hypertriglyceridemia with lower HDL cholesterol (11% in our study) and statins for reducing total and LDL cholesterol (54% in our study) (39). So far, in a limited number of children with familial and severe hypercholesterolemia, statins showed good LDL cholesterol-lowering efficacy and a low rate of side

effects (40). Beyond these effects, statins improve endothelial dysfunction and have antioxidant, antithrombotic, and anti-inflammatory properties that may contribute to their antiatherogenic efficacy (41,42).

In conclusion, this representative analysis demonstrates the high age-dependent frequency of atherogenic risk factors in children and adolescents with type 1 diabetes and underlines the importance of an early search for these risk factors. Significant sex differences were computed for most of the risk factors. The discrepancy between a high prevalence of cardiovascular risk factors and the low rate of antihypertensive and lipid-lowering treatment deserves special consideration.

**Acknowledgments**— The DPV program was supported by Novo Nordisk Germany, the Dr. Bürger-Büsing Foundation, the German Diabetes Foundation, and the German Ministry of Health.

We thank all investigators who participated in the DPV initiative. The following institutions contributed data to this analysis: Aachen, Uni-Kinderklinik RWTH; Ahlen, St. Franziskus Kinderklinik; Aue, Helios Kinderklinik; Augsburg, Innere; Augsburg, Kinderklinik, Zentralklinikum; Aurich, Kinderklinik; Bad Driburg/Bad Hermannsborn, Innere; Bad Hersfeld, Kinderklinik; Bad Kreuznach-St. Marienwörth, Innere; Bad Kösen, Kinder-Rehaklinik; Bad Lauterberg, Diabeteszentrum, Innere; Bad Oeynhausen, Diabetesfachklinik; Berlin, Kinderklinik Lindenhof; Berlin, Klinik St. Hedwig, Innere; Berlin, Schlosspark-Klinik, Innere; Berlin, Virchow-Kinderklinik; Berlin-Hellersdorf, Innere; Bielefeld, Kinderklinik Gilead; Bocholt, Innere Medizin; Bonn, Uni-Kinderklinik; Bottrop Kinderklinik; Bottrop, Knappschafts-Krankenhaus, Innere; Bremen, Kinderklinik Nord; Bremen, Kinderklinik St. Jürgenstrasse; Bremen, Epidemiologieprojekt; Bremerhaven, Kinderklinik; Bruckmühl, Internist. Praxis; Celle, Kinderklinik; Chemnitz, Kinderklinik; Coesfeld, Kinderklinik; Darmstadt, Kinderklinik Prinz. Margareth; Datteln, Vestische Kinderklinik; Deggendorf, Kinderarztpraxis; Deggendorf, Kinderklinik; Deggendorf, Medizinische Klinik II; Delmenhorst, Kinderklinik; Detmold, Kinderklinik; Dortmund, Kinderklinik; Dortmund, St. Josefshospital, Innere; Dresden, Uni-Kinderklinik; Düren-Birkesdorf, Kinderklinik; Düsseldorf, Uni-Kinderklinik; Erfurt, Kinderklinik; Erlangen, Uni-Kinderklinik; Essen, Uni-Kinderklinik; Esslingen, Städtische Kinderklinik; Eutin, Kinderklinik; Eutin, St.-Elisabeth, Innere; Frankfurt, Uni-Klinik, Innere; Freiburg, Uni-Kinderklinik; Friedberg, Innere Klinik; Friedrichshafen, Kinderklinik; Fulda, Innere Medizin; Fulda, Kinderklinik; Fürth, Kinderklinik; Gaissach, Kinder-Fachklinik;

Garmisch-Partenkirchen, Kinderklinik; Gelnhausen, Kinderklinik; Gelsenkirchen, Kinderklinik Marienhospital; Gießen, Uni-Kinderklinik; Göppingen, Kinderklinik am Eichert; Görlitz, Städtische Kinderklinik; Göttingen, Uni-Kinderklinik; Hachenburg, Kinderpraxis; Hagen, Kinderklinik; Halle, Uni-Kinderklinik; Halle-Dölau, Städtische Kinderklinik; Hamburg, Altonaer Kinderklinik; Hamburg, Kinderklinik Wilhelmstift; Hamburg-Nord, Kinderklinik Heidberg; Hamm, Kinderklinik; Hanau, Kinderklinik; Hanau, St. Vincenz, Innere; Hannover, Henriettenstift, Innere; Hannover, Kinderklinik MHH; Hannover, Kinderklinik auf der Bult; Heidelberg, Uni-Kinderklinik; Heidenheim, Kinderklinik; Heilbronn, Innere Klinik; Herdecke, Kinderklinik; Herford, Kinderklinik; Heringsdorf, Inselklinik; Hermeskeil, Kinderpraxis; Herten, St. Elisabeth, Innere Medizin; Herzberg, Kreiskrankenhaus, Innere; Hildesheim, Innere; Hildesheim, Kinderarztpraxis; Hildesheim, Kinderklinik; Hinrichs-Bruckmühl, Diabetikerjugendhaus; Homburg, Uni-Kinderklinik Saarland; Idar, Oberstein, Innere; Innsbruck, Universitätskinderklinik; Itzehoe, Kinderklinik; Jena, Uni-Kinderklinik; Kaiserslautern, Westfalzklinikum, Kinderklinik; Karlsruhe, Diabetesfachklinik; Karlsruhe, Städtische Kinderklinik; Kassel, Kinderklinik Park Schönfeld; Kassel, Städtische Kinderklinik; Kaufbeuren, Innere Medizin; Kempen, Heilig Geist, Innere; Kiel, Städtische Kinderklinik; Koblenz, Kemperhof, I. Med. Klinik; Koblenz, Kinderklinik Kemperhof; Konstanz, Innere Klinik; Krefeld, Innere Klinik; Köln, Uni-Kinderklinik; Landshut, Kinderklinik; Leipzig, Uni-Kinderklinik; Lingen, Kinderklinik St. Bonifatius; Lippstadt, Evangelische Kinderklinik; Ludwigsburg, Innere Medizin; Ludwigsburg, Kinderklinik; Ludwigshafen, Kinderklinik St. Anna-Stift; Lübeck, Uni-Kinderklinik; Lübeck, Uni-Klinik, Innere Medizin; Lüdenscheid, Kinderklinik; Magdeburg, Uni-Kinderklinik; Mannheim, Innere; Mannheim, Uni-Kinderklinik; Marburg, Uni, Innere; Marburg, Uni-Kinderklinik; Mechemich, Kinderklinik; Memmingen, Kinderklinik; Minden, Kinderklinik; Moers, Kinderklinik; Mutterstadt, Kinderarztpraxis; Mönchengladbach, Kinderklinik; Rheydt, Elisabethkrankenhaus; München, von Haunersche Kinderklinik; München-Harlaching, Kinderklinik; München-Schwabing, Kinderklinik; Münster, Kinderarztpraxis; Münster, Uni-Kinderklinik; Nagold, Kreiskrankenhaus, Innere; Neuburg, Kinderklinik; Neunkirchen, Kinderklinik Kohlhof; Neuss, Lukaskrankenhaus, Kinderklinik; Neuwied, Kinderklinik Elisabeth; Nürnberg, Cnopfsche Kinderklinik; Nürnberg, Kinderklinik, Klinikum Süd; Oberhausen, Innere; Oberhausen, Kinderklinik; Oberhausen, Kinderpraxis Bachran; Offenbach/Main, Kinderklinik; Oldenburg, Kinderklinik; Osnabrück, Kinderklinik; Paderborn, St. Vincenz, Kinderklinik; Passau, Kinderarztpraxis Handwerker; Passau, Kinderklinik; Pforzheim, Kinderklinik; Rastatt, Gemein-

schaftspraxis; Rastatt, Kreiskrankenhaus, Innere; Ravensburg, Kinderklinik St. Nikolaus; Recklinghausen, Dialysezentrum, Innere; Regensburg, Kinderklinik St. Hedwig; Remscheid, Kinderklinik; Rendsburg, Kinderklinik; Rheine, Kinderklinik; Rosenheim, Innere Medizin; Rosenheim, Kinderklinik; Rostock, Universität, Innere Medizin; Rotenburg/Wümme, Kinderklinik; Saaldorf-Surheim, Diabetespraxis; Saalfeld, Thüringenklinik, Kinderklinik; Saarbrücken, Kinderklinik Winterberg; Saarlouis, Kinderklinik; Scheidegg, Reha-Kinderklinik Maximilian; Schw. Gmünd, Margaritenhospital, Kinderklinik; Schweinfurt, Kinderklinik; Schwerin, Kinderklinik; Siegen, Kinderklinik; Singen, Hegauklinik, Kinderklinik; Sinsheim, Innere; Spaichingen, Innere; Stade, Kinderklinik; Stolberg, Kinderklinik; Stuttgart, Olghospital, Kinderklinik; Suhl, Kinderklinik; Sylt, Rehaklinik; Trier, Kinderklinik der Borromäerinnen; Tübingen, Uni-Kinderklinik; Ulm, Uni-Kinderklinik; Vechta, Kinderklinik; Viersen, Kinderklinik; Waiblingen, Kinderklinik; Waldshut, Kinderpraxis Biberbau; Weiden, Kinderklinik; Weingarten, Kinderarztpraxis; Wetzlar, Praxis Klewer/Teichner; Wetzlar/Braunsfeld, Innere; Wien, Uni-Kinderklinik; Wiesbaden, Horst-Schmidt-Kinderkliniken; Wiesbaden, Kinderklinik DKD; Worms, Kinderklinik; Wuppertal, Kinderklinik.

## References

- Laing SP, Swerdlow AJ, Slater SD, Botha JL, Burden AC, Waugh NR, Smith AWM, Hill RD, Bingley PJ, Patterson CC, Qiao Z, Keen H: The British Diabetic Association Cohort Study, II: cause-specific mortality in patients with insulin-treated diabetes mellitus. *Diabet Med* 16:466–471, 1999
- Berenson GS, Srinivasan SR, Bao W, Newman III WP, Tracy RE, Wattigney WA, for the Bogalusa Heart Study: Association between multiple cardiovascular risk factors and atherosclerosis in children and young adults. *N Engl J Med* 338:1650–1656, 1998
- Zieske AW, Malcolm GT, Strong JP: Natural history and risk factors of atherosclerosis in children and youth: the PDAY study. *Pediatr Pathol Mol Med* 21:213–237, 2002
- Järvisalo MJ, Putto-Laurila A, Jarri L, Lehtimäki T, Solakivi T, Rönnemaa T, Raitakari OT: Carotid artery intima-media thickness in children with type 1 diabetes. *Diabetes* 51:493–498, 2002
- Miller J, Silverstein J: Cardiovascular risk factors in childhood diabetes. *Endocrinologist* 13:394–407, 2003
- Hecker W, Grabert M, Holl RW, the German Paediatric Diabetology Group: Quality of paediatric IIDM care in Germany: a multicenter analysis. *J Pediatr Endocrinol Metab* 12:31–38, 1999
- Grabert M, Schweiggert F, Holl RW: A framework for diabetes documentation and quality management in Germany: 10 years of experience with DPV. *Comput Methods Programs Biomed* 69:115–121, 2002
- The Diabetes Control and Complications Trial Research Group: The effect of intensive treatment of diabetes on the development and progression of long-term complications in insulin-dependent diabetes mellitus. *N Engl J Med* 329:977–986, 1993
- Kromeyer-Hauschild K, Wabitsch M, Kunze D, Geller F, Geiß HC, Hesse V, von Hippel A, Jaeger U, Johnsen D, Korte W, Menner K, Müller G, Müller JM, Niemann-Pilatus A, Remer T, Schaefer F, Wittchen HU, Zabransky S, Zellner K, Ziegler A, Hebebrand J: Perzentile für den Body-mass-Index für das Kindes- und Jugendalter unter Heranziehung verschiedener deutscher Stichproben. *Monatsschr Kinderheilkd* 149:807–818, 2001
- Mensink G, Burger M, Beitz R, Henschel Y, Hintzpetzer B: Ernährungsverhalten in Deutschland. In *Beiträge zur Gesundheitsberichterstattung des Bundes*. Lange R, Ziese T, Robert Koch-Institut, Eds. Berlin, MuK (Medien und Kommunikation) 2002, p. 131–133
- National High Blood Pressure Education Program Working Group on High Blood Pressure in Children and Adolescents: the fourth report on the diagnosis, evaluation, and treatment of high blood pressure in children and adolescents. *Pediatrics* 114:555–576, 2004
- National High Blood Pressure Education Program Working Group on Hypertension Control in Children and Adolescents: Update on the 1987 task force report on high blood pressure in children and adolescents. *Pediatrics* 98:649–658, 1996
- Roche HM: Dietary carbohydrates and triacylglycerol metabolism. *Proc Nutr Soc* 58:201–206, 1999
- American Academy of Pediatrics: National Cholesterol Education Program: report of the Expert Panel on Blood Cholesterol Levels in Children and Adolescents. *Pediatrics* 89:525–584, 1992
- Silverstein J, Klingensmith G, Copeland K, Plotnick L, Kaufman F, Laffel L, Deeb L, Grey M, Anderson B, Holzmeister LA, Clark N: Care of children and adolescents with type 1 diabetes: a statement of the American Diabetes Association. *Diabetes Care* 28:186–212, 2005
- Lipmann TH, Hayman LL, Fabian CV, DiFazio DA, Hale PM, Goldsmith BM, Piascik PC: Risk factors for cardiovascular disease in children with type 1 diabetes. *Nurs Res* 49:160–166, 2000
- Soedamah-Muthu SS, Chaturvedi N, Toeller M, Ferriss B, Reboldi P, Michel G, Manes C, Fuller JH, the EURODIAB Prospective Complications Study Group: Risk factors for coronary heart disease in type 1 diabetic patients in Europe. *Diabetes Care* 27:530–537, 2004
- Orchard TJ, Olson JC, Erbey JR, Williams K, Forrest KY, Smithline Kinder L, Ellis D, Becker DJ: Insulin resistance-related factors, but not glycemia, predict coronary artery disease in type 1 diabetes. *Diabetes Care* 26:1374–1379, 2003
- Brink SJ: Complications of pediatric and adolescent type 1 diabetes mellitus. *Curr Diab Rep* 1:47–55, 2001
- Diabetes Control and Complications Trial (DCCT)/Epidemiology of Diabetes Intervention and Complications (EDIC) Research Group: Beneficial effects of intensive therapy of diabetes during adolescence: outcomes after the conclusion of the Diabetes Control and Complications Trial (DCCT). *J Pediatr* 139:804–812, 2001
- The Diabetes Control and Complications Trial/Epidemiology of Diabetes Interventions and Complications Research Group: Intensive diabetes therapy and carotid intima-media thickness in type 1 diabetes mellitus. *N Engl J Med* 348:2294–2003, 2003
- Gerstein HC, Anand S, Yi QL, Vuksan V, Lonn E, Teo K, Malmberg K, McQueen M, Yusuf S, the SHARE Investigators: The relationship between dysglycemia and atherosclerosis in South Asian, Chinese, and European individuals in Canada. *Diabetes Care* 26:144–149, 2003
- Snell-Bergeon JK, Hokanson JE, Jensen L, MacKenzie T, Kinney G, Dabelea D, Eckel RH, Ehrlich J, Garg S, Rewers M: Progression of coronary artery calcification in type 1 diabetes. *Diabetes Care* 26:2923–2928, 2003
- Srinivasan SR, Myers L, Berenson GS: Predictability of childhood adiposity and insulin for developing insulin resistance syndrome (syndrome X) in young adulthood. *Diabetes* 51:204–209, 2002
- Csabi G, Török K, Jeges S, Molnar D: Presence of metabolic cardiovascular syndrome in obese children. *Eur J Pediatr* 159:91–94, 2000
- Mangge H, Schauenstein K, Stroedter L, Griesl A, März W, Borkenstein M: Low grade inflammation in juvenile obesity and type 1 diabetes associated with early signs of atherosclerosis. *Exp Clin Endocrinol Diabetes* 112:378–382, 2004
- Berenson GS, Srinivasan SR: Emergence of obesity and cardiovascular risk for coronary artery disease: the Bogalusa Heart Study. *Prev Cardiol* 4:116–121, 2001
- The Global Youth Tobacco Survey Collaborative Group: Tobacco use among youth: a cross country comparison. *Tob Contol* 11:252–270, 2002
- Ford ES, Mokdad AH, Gregg EW: Trends in cigarette smoking among US adults with diabetes: findings from the Behavioral Risk Factor Surveillance System. *Prev Med* 39:1238–1242, 2004
- Erbey JR, Robbins D, Forrest KY-Z, Or-

- chard TJ: Low-density lipoprotein particle size and coronary artery disease in a childhood-onset type 1 diabetes population. *Metabolism* 48:531–534, 1999
31. Sibley SD, Hokanson JE, Steffes MW, Purnell JQ, Marconvina SM, Cleary PA, Brunzell JD: Increased small dense LDL and intermediate-density lipoprotein with albuminuria in type 1 diabetes. *Diabetes Care* 22:1165–1170, 1999
  32. Lloyd CE, Kuller LH, Ellis D, Becker DJ, Wing RR, Orchard TJ: Coronary artery disease in IDDM. *Arterioscler Thromb Vasc Biol* 16:720–726, 1996
  33. Dabelea D, Kinney G, Snell-Bergeon JK, Hokanson JE, Eckel RH, Ehrlich J, Garg S, Hamman RF, Rewers M: Effect of type 1 diabetes on the gender difference in coronary artery calcification: a role for insulin resistance? *Diabetes* 52:2833–2839, 2003
  34. Grant WR, Buse JB, Meigs JB, the University Health System Consortium (UHC) Diabetes Benchmarking Project Team: Quality of diabetes care in U.S. academic medical centers. *Diabetes Care* 28:337–442, 2005
  35. Romano M, Pomilio M, Vigneri S, Falco A, Chiesa PL, Chiarelli F, Davi G: Endothelial perturbation in children and adolescents with type 1 diabetes. *Diabetes Care* 24:1674–1678, 2001
  36. Krantz JS, Mack WJ, Hodis HN, Liu C-R, Liu C-H, Kaufman FR: Early onset of subclinical atherosclerosis in young persons with type 1 diabetes. *J Pediatr* 145:452–457, 2004
  37. Rascher W: The hypertensive child. In *Oxford Textbook of Clinical Nephropathy*. 2th ed. Davison AM, Cameron JS, Grünfeld IP, Kerr DNS, Ritz E, Winearls CG, Eds. New York, Oxford University Press, 1998
  38. Betteridge DJ: Diabetic dyslipidaemia. *Diabetes Obes Metab* 2 (Suppl. 1):S31–S36, 2000
  39. Farnier M, Picard S: Diabetes: statins, fibrates, or both? *Curr Atheroscler Rep* 3: 19–28, 2001
  40. Black DM: Statins in children: what do we know and what do we need to know? *Curr Atheroscler Rep* 3:29–34, 2001
  41. McCrindle BW, Ose L, Marais D: Efficacy and safety of atorvastatin in children and adolescents with familial hypercholesterolemia or severe hyperlipidemia: a multicenter, randomized, placebo-controlled trial. *J Pediatr* 142:74–80, 2003
  42. Bonetti PO, Lerman LO, Napoli C, Lerman A: Statin effects beyond lipid lowering: are they clinically relevant? *Eur Heart J* 24:225–248, 2003
